# Supplementary material for: Hypoxic preconditioning‐induced autophagy enhances survival of engrafted endothelial progenitor cells in ischaemic limb
Source: PubMed Central journal article supplement (PMC5618704; doi:10.1111/jcmm.13167), 2017-04-04
Supplement: JCMM-21-2452-s001.pdf [file JCMM-21-2452-s001.pdf]

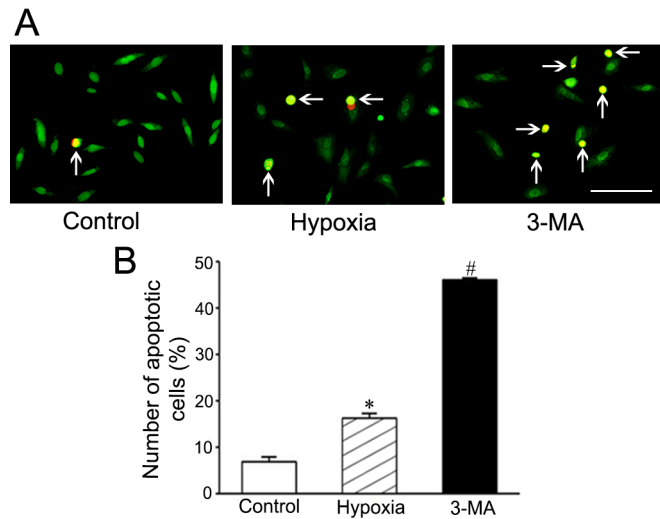

**Fig. S1** Effect of autophagy on apoptosis of the cells after treatment with hypoxia for 2 h. (A) Images of the apoptotic cells demonstrated with EB/AO staining. After treatment with 3-MA, the apoptotic cells in the hypoxic cells increase. Bar = 100  $\mu$ m. (B) Statistic result of the number of the apoptotic cells in the hypoxic cells. \* $p < 0.05$  vs. control group, # $p < 0.05$  vs. hypoxia group.

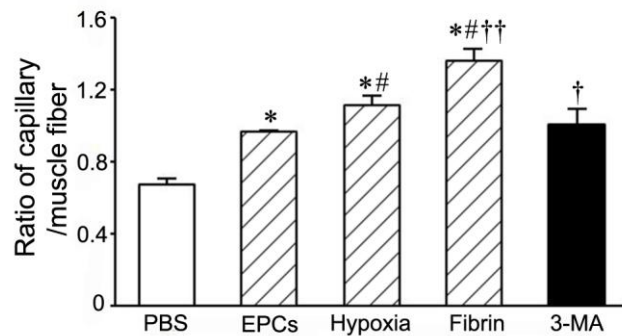

**Fig. S2** Statistic result of the density of the microvessels in the ischemic limbs after transplantation. \* $p < 0.01$  vs. PBS group, # $p < 0.01$  vs. EPC group, † $p < 0.05$  and †† $p < 0.01$  vs. hypoxia group.

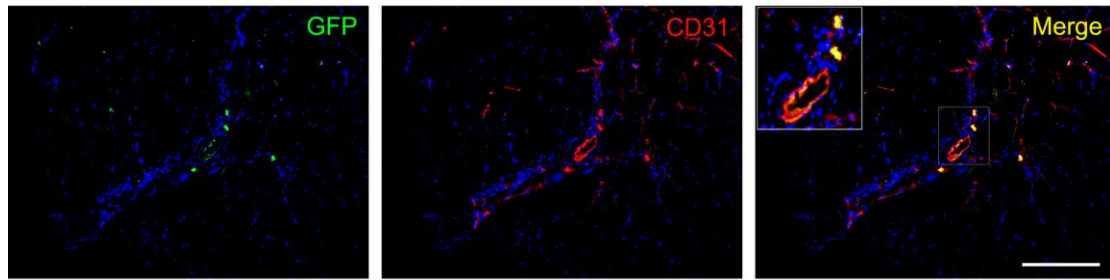

**Fig. S3** Location of GFP<sup>+</sup>CD31<sup>+</sup> cells at the walls of the microvessels. At day 21 after transplantation of GFP-labeled EPCs, expression of CD31 on the cells were examined with immunostaining. Some GFP<sup>+</sup> cells express CD31 and incorporate into the walls of the microvessels. The large box shows the magnified view of the small box. Bar = 200  $\mu$ m.
